# Supplementary material for: A Novel Insertion in the Hepatitis B Virus Surface Protein Leading to Hyperglycosylation Causes Diagnostic and Immune Escape
Source: MDPI journal article supplement (doi:10.3390/v15040838), 2023-03-25
Supplement: s1 [file s1]

## **Supplementary Information:**

### **“A Novel Insertion in the Hepatitis B Virus Surface Protein leading to Hyperglycosylation causes Diagnostic and Immune Escape”**

Felix Lehmann, Heiko Slanina, Martin Roderfeld, Elke Roeb, Jonel Trebicka, John Ziebuhr, Wolfram H. Gerlich, Christian G. Schüttler, Bernhard Schlevogt, Dieter Glebe

Dieter Glebe

Email: [dieter.glebe@viro.med.uni-giessen.de](mailto:dieter.glebe@viro.med.uni-giessen.de)

#### **This PDF file includes:**

Figure S1

Table S1

|                  | 80                                                                                        | 90 | 100 | 110 | 120 |                   |
|------------------|-------------------------------------------------------------------------------------------|----|-----|-----|-----|-------------------|
| gtD3 Reference   | F I I F L F I L L L C L I F L L V L L D Y Q G M L P V C P L I P G S S T T S T G P C R T C |    |     |     |     | - - - M T T A Q   |
| Cluster 1 (3/12) | .                                                                                         | .  | .   | .   | .   | - - - T . L .     |
| Cluster 2 (5/12) | .                                                                                         | .  | .   | .   | .   | - - - I . R . N   |
| Cluster 3 (1/12) | .                                                                                         | .  | .   | .   | .   | - - - . P . P     |
| Cluster 4 (3/12) | .                                                                                         | .  | .   | .   | .   | - - - N C T . V . |

  

|                  | 130                                                                                                 | 140                                                 | 150 | 160 | 170 |   |
|------------------|-----------------------------------------------------------------------------------------------------|-----------------------------------------------------|-----|-----|-----|---|
| gtD3 Reference   | G T S M Y P S C C C T K P S D G N C T C I P I P S S W A F G K F L W E W A S A R F S W L S L L V P F |                                                     |     |     |     |   |
| Cluster 1 (3/12) | .                                                                                                   | .                                                   | .   | .   | .   | A |
| Cluster 2 (5/12) | N I . . . . . S . . . . . V . . . . .                                                               |                                                     |     |     |     |   |
| Cluster 3 (1/12) | R N F T . . . . . I . L . . . . . N . . . . . V . . . . .                                           |                                                     |     |     |     |   |
| Cluster 4 (3/12) | .                                                                                                   | S . Y . . . . . I . . . . . T . . . . . A . . . . . |     |     |     |   |

  

|                  | 180                                                                                           | 190 | 200 | 210 | 220 |                                         |
|------------------|-----------------------------------------------------------------------------------------------|-----|-----|-----|-----|-----------------------------------------|
| gtD3 Reference   | V Q W F V G L S P T V W L S V I W M M W Y W G P S L Y S I L S P F L P L L P I F F C L W V Y I |     |     |     |     |                                         |
| Cluster 1 (3/12) | .                                                                                             | .   | .   | .   | .   | N . C R . . . . . M . . . . .           |
| Cluster 2 (5/12) | .                                                                                             | .   | .   | .   | .   | . . . . . R . . . . .                   |
| Cluster 3 (1/12) | .                                                                                             | .   | .   | .   | .   | . . . . . N . R . . . . . L . . . . .   |
| Cluster 4 (3/12) | .                                                                                             | .   | .   | .   | .   | . . . . . N . C R . . . . . M . . . . . |

|                  | 90                                                    | 100 | 110 | 120 | 130 | 140                          | 150 |
|------------------|-------------------------------------------------------|-----|-----|-----|-----|------------------------------|-----|
| gtD3 Reference   | YHLP LHPAAMP HLLVGSS GLS RYVAR LSS NSR I LNNQHGTMP DL | -   | -   | -   | -   | HDYCS RNLYVS L LLLYQT FGRKLH |     |
| Cluster 1 (3/12) | .                                                     | .   | .   | .   | H.  | N.                           | S.  |
| Cluster 2 (5/12) | .                                                     | I.  | .   | .   | H.  | N.                           | S.  |
| Cluster 3 (1/12) | .                                                     | I.  | .   | .   | DH. | N.                           | S.  |
| Cluster 4 (3/12) | .                                                     | .   | .   | .   | H.  | N.                           | K.  |

  

|                  | 160                                                     | 170                            | 180 | 190 | 200 | 210 | 220 |
|------------------|---------------------------------------------------------|--------------------------------|-----|-----|-----|-----|-----|
| gtD3 Reference   | LYSHP I I LGFRK IPMGVGLS P FLLAQFTSA ICS VVRRAFP HCLAFS | YMD D VV LGA KS VQHLES LFTAVTN |     |     |     |     |     |
| Cluster 1 (3/12) | .                                                       | M.                             | .   | .   | .   | .   | S.  |
| Cluster 2 (5/12) | .                                                       | M.                             | .   | .   | .   | .   | P.  |
| Cluster 3 (1/12) | .                                                       | VM.                            | .   | L.  | .   | .   | S.  |
| Cluster 4 (3/12) | .                                                       | M.                             | .   | .   | .   | .   | S.  |

  

|                  | 230                                                               | 240 | 250 | 260 | 270 | 280 |
|------------------|-------------------------------------------------------------------|-----|-----|-----|-----|-----|
| gtD3 Reference   | FLLS LG IHLNPNKTKRWGYS LNFMGVYV IG CYGS LPQEH I IQK IKECFRKLP INR |     |     |     |     |     |
| Cluster 1 (3/12) | .                                                                 | .   | .   | H.  | V.  | G.  |
| Cluster 2 (5/12) | .                                                                 | .   | .   | H.  | V.  | G.  |
| Cluster 3 (1/12) | .                                                                 | .   | .   | H.  | V.  | G.  |
| Cluster 4 (3/12) | .                                                                 | .   | .   | H.  | V.  | G.  |

**Figure S1: Alignment of amplified (partial) SHBs and polymerase sequences. (A)** SHBs primary protein sequence (aa80-226). Cluster 1 represents HBV genotype D3, serotype ayw4. In the remaining clusters, several mutations were found: Three previously described diagnostic escape mutations (Cluster 2: T131I; Cluster 3: G130R/K141I; yellow), a six-nucleotide insertion (Cluster 4; orange), and substitutions introducing N-glycosylation motifs (Clusters 2-4; boxed). The conserved N-glycosylation site (N146) is shown in green. **(B)** Reverse Transcriptase domain primary protein sequence (aa89-280). The catalytic site (YMDD; red) is conserved in all isolates. The insertion of Cluster 4 introduces two amino acids (orange).

**Table S1: Original data and respective calculated reactivities of anti-HBs to variant HBsAg. (A)** Anti-HBs-positive human sera were diluted to reach approx. 50 IU/L anti-HBs, incubated with 10 IU/mL cell-culture-derived HBsAg for 1h, 37°C and subsequently subjected to the quantitative Architect anti-HBs-assay (Abbott). **(B)** Based on data presented in A, relative anti-HBs/HBsAg-reactivities were calculated as follows: For each serum, the individual range between negative control NC (0 %) and wildtype reference R (100 %) was used to convert measured anti-HBs values of mutant HBsAg (Cluster 1-4) into relative reactivities. Values above 100 % represent higher reactivity of HBsAg sample with anti-HBs than the reference. Accordingly, values below 0 % represent no reactivity with anti-HBs. Anti-HBs levels of all five naïve sera were 0.00 IU/L for all tested HBsAg samples and disregarded in this table.

| <b>A</b>  |                         | <b>Measured anti-HBs [IU/L]</b>                     |                  |                  |                  |                  |           |
|-----------|-------------------------|-----------------------------------------------------|------------------|------------------|------------------|------------------|-----------|
|           | <b>Serum identifier</b> | <b>Reference (R)</b>                                | <b>Cluster 1</b> | <b>Cluster 2</b> | <b>Cluster 3</b> | <b>Cluster 4</b> | <b>NC</b> |
| Vaccinees | 2100001                 | 23.00                                               | 16.15            | 31.83            | 51.91            | 52.92            | 54.97     |
|           | 2144557                 | 23.94                                               | 19.35            | 31.28            | 40.60            | 41.11            | 41.66     |
|           | 2144644                 | 26.38                                               | 23.94            | 31.60            | 39.45            | 38.16            | 39.46     |
|           | 2145601                 | 23.92                                               | 18.07            | 31.24            | 43.75            | 42.57            | 42.81     |
|           | 2145578                 | 38.84                                               | 40.89            | 45.65            | 49.70            | 50.62            | 52.14     |
|           | 2146118                 | 18.84                                               | 13.42            | 24.91            | 39.90            | 43.79            | 46.53     |
| Recovered | 2144555                 | 25.59                                               | 22.04            | 31.47            | 42.63            | 41.69            | 41.18     |
|           | 2144803                 | 11.42                                               | 7.72             | 18.48            | 38.02            | 37.87            | 41.46     |
|           | 2144893                 | 18.09                                               | 22.49            | 37.08            | 45.53            | 44.19            | 46.34     |
|           | 2145252                 | 32.57                                               | 22.26            | 36.48            | 50.66            | 48.48            | 48.61     |
|           | 2145480                 | 31.25                                               | 21.87            | 33.58            | 52.02            | 48.78            | 50.56     |
|           | 2145813                 | 14.95                                               | 10.52            | 19.58            | 38.84            | 40.38            | 36.91     |
| <b>B</b>  |                         | <b>Relative anti-HBs/HBsAg-reactivity [% of WT]</b> |                  |                  |                  |                  |           |
|           | <b>Serum identifier</b> | <b>Reference (R)</b>                                | <b>Cluster 1</b> | <b>Cluster 2</b> | <b>Cluster 3</b> | <b>Cluster 4</b> | <b>NC</b> |
| Vaccinees | 2100001                 | 100.00                                              | 121.43           | 72.38            | 9.57             | 6.41             | 0.00      |
|           | 2144557                 | 100.00                                              | 125.90           | 58.58            | 5.98             | 3.10             | 0.00      |
|           | 2144644                 | 100.00                                              | 118.65           | 60.09            | 0.08             | 9.94             | 0.00      |
|           | 2145601                 | 100.00                                              | 130.97           | 61.25            | -4.98            | 1.27             | 0.00      |
|           | 2145578                 | 100.00                                              | 84.59            | 48.80            | 18.35            | 11.43            | 0.00      |
|           | 2146118                 | 100.00                                              | 119.57           | 78.08            | 23.94            | 9.90             | 0.00      |
| Recovered | 2144555                 | 100.00                                              | 122.77           | 62.28            | -9.30            | -3.27            | 0.00      |
|           | 2144803                 | 100.00                                              | 112.32           | 76.50            | 11.45            | 11.95            | 0.00      |
|           | 2144893                 | 100.00                                              | 84.42            | 32.78            | 2.87             | 7.61             | 0.00      |
|           | 2145252                 | 100.00                                              | 164.28           | 75.62            | -12.78           | 0.81             | 0.00      |
|           | 2145480                 | 100.00                                              | 148.58           | 87.93            | -7.56            | 9.22             | 0.00      |
|           | 2145813                 | 100.00                                              | 120.17           | 78.92            | -8.79            | -15.80           | 0.00      |
